# Supplementary material
Source: Springer Nature journal article supplement (https://www.springermedizin.de/resource/supplementary/13046_2010_328_MOESM1_ESM.pdf/9662132)

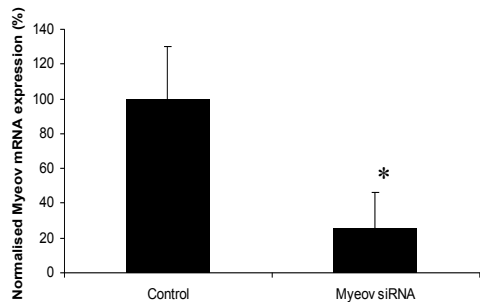

1A

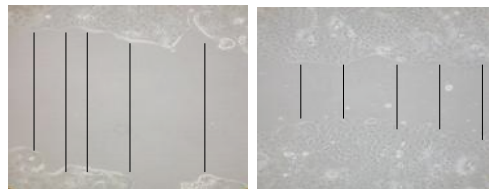

Control 6 hours

Control 36 hours

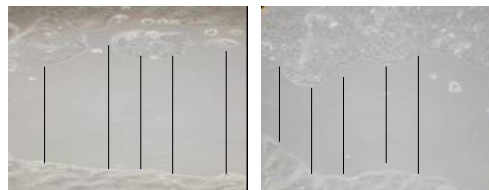

Myeov-siRNA 6 hours

Myeov-siRNA 36 hours

1B

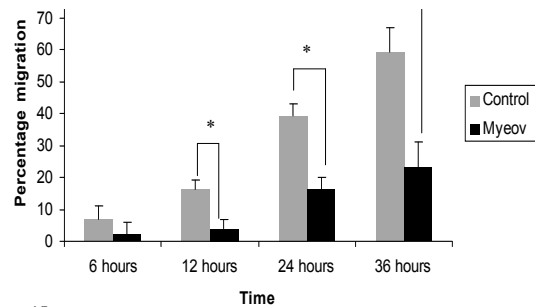

1C

Supplement: MOESM1 [file 9662132]
